## Inhibitor of growth protein 4 interacts with Beclin 1 and represses autophagy

Valentina Sica<sup>1,2,3,4,5,\*</sup>, José Manuel Bravo-San Pedro<sup>1,2,3,4,5,\*</sup>, Guo Chen<sup>1,2,3,4,5</sup>, Guillermo Mariño<sup>3,6</sup>, Sylvie Lachkar<sup>1,2,3,4,5</sup>, Valentina Izzo<sup>1,2,3,4,5</sup>, Maria Chiara Maiuri<sup>1,2,3,4,5</sup>, Mireia Niso-Santano<sup>3,7,8,\*\*</sup> and Guido Kroemer<sup>1,2,3,4,5,9,10,\*\*</sup>

<sup>1</sup> Université Paris Descartes, Sorbonne Paris Cité, Paris, France

<sup>2</sup> Equipe 11 labellisée Ligue Nationale contre le Cancer, Centre de Recherche des Cordeliers, Paris, France

<sup>3</sup> Institut National de la Santé et de la Recherche Médicale, Paris, France

<sup>4</sup> Université Pierre et Marie Curie, Paris, France

<sup>5</sup> Metabolomics and Cell Biology Platforms, Gustave Roussy Cancer Campus, Villejuif, France

<sup>6</sup> Departamento de Biología Fundamental, Instituto de Investigación Sanitaria del Principado de Asturias, Universidad de Oviedo, Spain

<sup>7</sup> Centro de Investigación Biomédica en Red en Enfermedades Neurodegenerativas, Cáceres, Spain

<sup>8</sup> Facultad de Enfermería y Terapia Ocupacional, Universidad de Extremadura, C.P, Cáceres, Cáceres, Spain

<sup>9</sup> Pôle de Biologie, Hôpital Européen Georges Pompidou, AP-HP, Paris, France

<sup>10</sup> Department of Women's and Children's Health, Karolinska University Hospital, Stockholm, Sweden

\* These authors have contributed equally to this article

\*\* These authors share co-senior authorship

**Correspondence to:** Guido Kroemer, **email:** kroemer@orange.fr

**Keywords:** cancer, ING4, PIK3C3, TP53, Autophagy

**Received:** March 16, 2017

**Accepted:** April 17, 2017

**Published:** July 06, 2017

Copyright: Sica et al. This is an open-access article distributed under the terms of the Creative Commons Attribution License 3.0 (CC BY 3.0), which permits unrestricted use, distribution, and reproduction in any medium, provided the original author and source are credited.

### ABSTRACT

**Beclin 1 (BECN1) is a multifunctional protein that activates the pro-autophagic class III phosphatidylinositol 3-kinase (PIK3C3, best known as VPS34), yet also interacts with multiple negative regulators. Here we report that BECN1 interacts with inhibitor of growth family member 4 (ING4), a tumor suppressor protein that is best known for its capacity to interact with the tumor suppressor protein p53 (TP53) and the acetyltransferase E1A binding protein p300 (EP300). Removal of TP53 or EP300 did not affect the BECN1/ING4 interaction, which however was lost upon culture of cells in autophagy-inducing, nutrient free conditions. Depletion of ING4 stimulated the enzymatic activity of PIK3C3, as visualized by means of a red fluorescent protein-tagged short peptide (FYVE) that specifically binds to phosphatidylinositol-3-phosphate (PI3P)-containing subcellular vesicles and enhanced autophagy, as indicated by an enhanced lipidation of microtubule-associated proteins 1A/1B light chain 3 beta (LC3B) and the redistribution of a green-fluorescent protein (GFP)-LC3B fusion protein to cytoplasmic puncta. The generation of GFP-LC3B puncta stimulated by ING4 depletion was reduced by simultaneous depletion, or pharmacological inhibition, of PIK3C3/VPS34. In conclusion, ING4 acts as a negative regulator of the lipid kinase activity of the BECN1 complex, and starvation-induced autophagy is accompanied by the dissociation of the ING4/BECN1 interaction.**

## INTRODUCTION

Macroautophagy, to which we refer as ‘autophagy’, is a catabolic process that cells use to cope with stressful conditions such as nutrient deprivation, organelle dysfunction or invasion of the cytoplasm by infectious pathogens [1, 2]. Alterations in autophagy are linked to multiple diseases, including aging [3], cancer [4], and neurodegenerative disorders [5]. Autophagy consists in the sequestration of cytoplasmic material in double-membraned vesicles (autophagosomes) that fuse with lysosome (autophagolysosomes) where the luminal content is degraded by the action of hydrolases operating at low pH [6].

The formation of autophagosomes is finely regulated by the concerted action of protein kinases, in particular unc-51 like autophagy activating kinases (ULK1/ULK2), the beclin 1 (BECN1) lipid kinase complex and an ubiquitin-like conjugation system [7]. The first step of vesicles nucleation depends on the activation of phosphatidylinositol 3-kinase catalytic subunit type 3 (PIK3C3, best known as VPS34), which operates in the context of the BECN1 complex [8]. Numerous additional proteins interact with BECN1 to activate or inhibit VPS34 and hence to initiate or suppress autophagy [9-12].

The evolutionarily conserved inhibitor of growth family (ING) [13] consists of several proteins that are generally considered as tumor suppressors and possess a similar domain organization [14]. ING proteins are highly homologous in the C terminal domain. Each of them harbors a plant homeodomain (PHD), a nuclear localization signal (NLS), as well as a noncoding region (NCR) [13]. The five proteins from the ING family (ING1-5) are involved in the regulation of cell cycle progression, apoptosis, senescence and DNA repair [15, 16]. Importantly, all ING proteins modulate the enzymatic (de)acetylase activity of histone acetyl transferases (HATs) and histone deacetylases (HDACs), thereby influencing histone acetylation and gene transcription [17, 18].

In several types of malignancy, the expression of ING proteins is reduced [19]. Ovarian, breast, head & neck carcinomas, as well as melanomas exhibit decreased expression of *ING1* [20]. Lung cancer and melanoma often show reduced levels of *ING2* [21, 22], while gliomas, advanced breast cancers and cervical and uroepithelial carcinomas underexpress *ING4* [23-26]. *ING4* loss is also an unfavorable prognostic marker in colorectal cancer [27] and gastrointestinal stromal tumors [28]. For this reason, studies have been launched to (re)express *ING4* in cancers by means of viral vectors, with some encouraging preclinical results [29-33].

*ING4* can arrest the cell cycle of HepG2 hepatocarcinoma cells and induce apoptosis by means of activation of the tumor suppressor p53 (TP53) and subsequent upregulation of cyclin-dependent kinase inhibitor 1 (CDK1, best known as p21) [34]. *ING4*

participates to a chromatin-binding multiprotein complex, together with TP53 and acetyltransferase E1A Binding Protein P300 (EP300), in which TP53 is acetylated by EP300, resulting in its transcriptional activation [35]. Moreover, *ING4* binds to nuclear factor NFκB p65 subunit (encoded by the *RelA* gene), targeting it for ubiquitinylation and proteasomal destruction [36], meaning that *ING4* deficiency can unleash NFκB activation and favor angiogenesis in glioblastoma [23]. Moreover, the PHD domain of *ING4* directly binds to histone H3 trimethylated at lysine 4 (H3K4me3), thereby recruiting the HBO1 histone HAT complex to target promoters, thereby facilitating histone H3 acetylation [37, 38].

Our group published the results of a yeast-2-hybrid screen suggesting that *ING4* is part of the BECN1 interactome [12]. Intrigued by this observation, we investigated the putative role of *ING4* as an autophagy regulator. Here we report evidence that *ING4* indeed interacts with BECN1 in baseline conditions, in human cells. Importantly, nutrient depletion, which is (one of) the most physiological inducer(s) of autophagy [39], causes *ING4* to dissociate from BECN1. Moreover, depletion of *ING4* was sufficient to increase autophagic flux, supporting the idea that *ING4* acts as a potent endogenous inhibitor of autophagy.

## RESULTS AND DISCUSSION

Interaction between *ING4* and BECN1. Previous work has revealed that the N-terminal domain of *ING4* (4-150 residues among 245) interacts with human BECN1 protein in a yeast-two-hybrid system [12]. To investigate whether this interaction occurs in human cells, we transfected human osteosarcoma U2OS cells with Flag-tagged *ING4* alone or together with His-tagged BECN1. Upon pull-down of Flag-*ING4*, His-BECN1 was detectable in the immunoprecipitate (Figure 1). While the immunoprecipitate of Flag-*ING4* contained multiple acetylated proteins, there was no particular increase in protein acetylation of the co-transfected His-BECN1 (approximate molecular weight 70 kDa), suggesting that BECN1 itself is not a target of the acetyltransferase activity of the complex in which *ING4* takes part (Supplemental Figure 1S). Indeed, *ING4* is known to interact with the acetyltransferase EP300 and the tumor suppressor TP53 [35]. We therefore investigated whether the interaction between Flag-*ING4* and His-BECN1 would depend on EP300 or TP53. However, the immunoprecipitate of Flag-*ING4* continued to contain His-BECN1 in human colorectal HCT116 cells in which EP300 or TP53 were removed by homologous recombination [40] (Figure 2). Altogether, these data plead in favor of a direct protein-protein interaction between *ING4* and BECN1, confirming the yeast-2-hybrid data [12].

Reduction of the interaction between ING4 and BECN1 upon starvation. The most physiological stimulus for autophagy induction is starvation [39, 41, 42]. When U2OS cells were cultured in nutrient-free (NF) conditions, the interaction between Flag-ING4 and His-BECN1 was largely reduced (Figure 3A) although starvation barely affected the expression levels of Flag-ING4 (Figure 3B). These findings suggest that the physiological induction of autophagy correlates with alterations in the BECN1 interactome that include a reduction in the interaction with ING4.

**Inhibition of autophagy by ING4.** Overexpression of Flag-ING4 had no major effect on the frequency of GFP-LC3-positive puncta in the cytoplasm of HCT116 and U2OS cells, and failed to cause a major reduction in autophagic puncta generated in response to NF conditions (Figure 4A, 4B) or autophagy enhancers as Torin1 or rapamycin (Rapa) respectively (Supplemental Figure 2S). A similar marginal effect could be seen when the ratio

of lipidated (electrophoretically more mobile) over non-lipidated (less mobile) LC3 and SQSTM1 (best known as p62) degradation were determined by immunoblot as a surrogate of the membrane distribution of LC3 (Figure 4C). This suggests that overexpression of ING4 is unable to inhibit autophagy induced by starvation.

Next, we depleted ING4 using three distinct, non-overlapping small interfering RNAs (siRNAs). All siRNAs caused an increase in the number of GFP-LC3B-positive puncta in HCT116 cells, both in fed conditions (Figure 5A, 5B) as well as in conditions of starvation, in which the depletion of ING4 caused a hyperinduction of autophagic puncta (Figure 5A, 5C). In the presence of bafilomycin A1 (BAFA1) for 3h, which inhibits the fusion of lysosomes with autophagosomes, thus blocking the last step of autophagy, the increase in GFP-LC3-positive puncta by ING4 depletion was also detectable, both in baseline conditions (Figure 5A, 5D) and upon starvation (Figure 5A, 5E). The same results were also observed

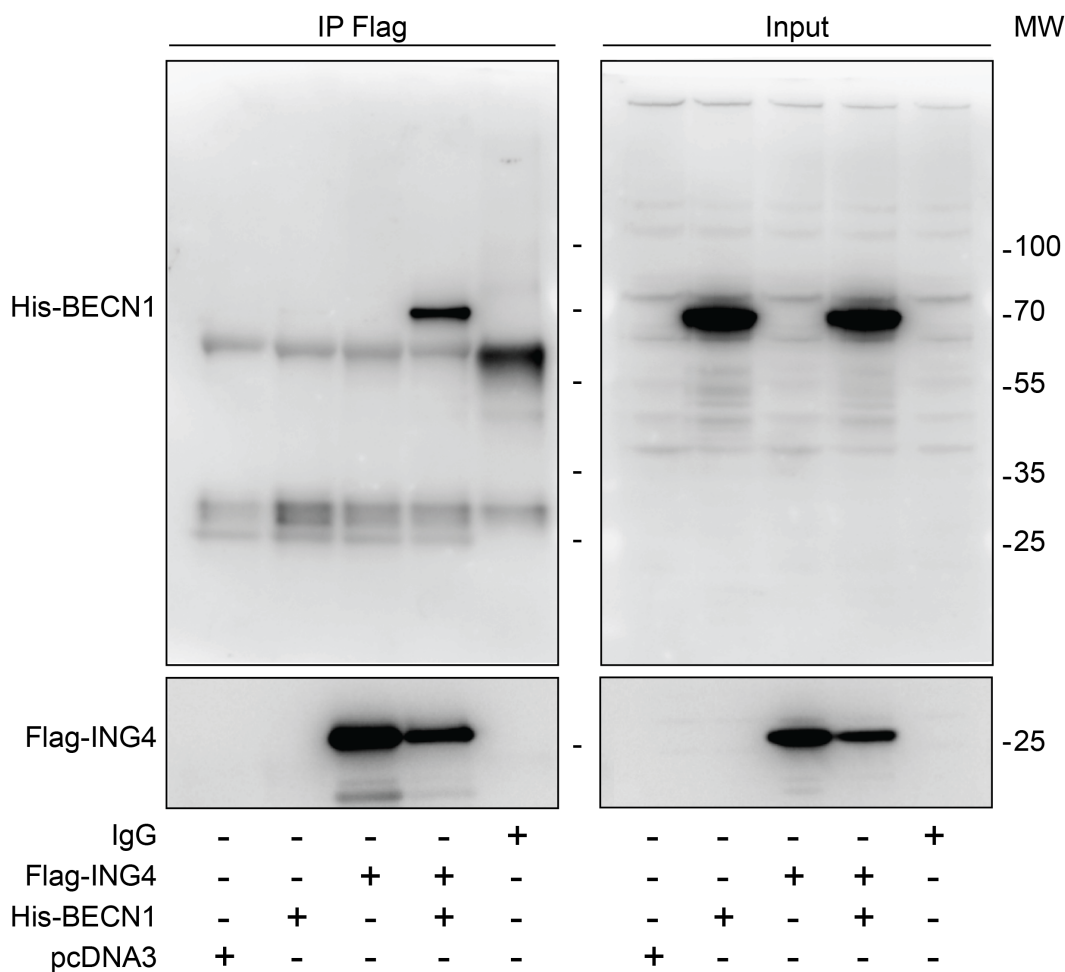

**Figure 1: Interaction between ING4 and BECN1.** Co-immunoprecipitation of BECN1 with ING4. The indicated constructs, namely Flag-tagged ING4 (Flag-ING4) and His-tagged BECN1 (His-BECN1) were transfected into U2OS cells alone or in combination. The pcDNA3 construct was transfected as internal control of the experiment. Forty-eight hours later, ING4 was immunoprecipitated with a specific antibody for Flag and the precipitate was separated by SDS-PAGE and revealed with an antibody specific for His (upper panels) or Flag (down panels). Results are representative of three independent experiments. Immunoprecipitation (IP), molecular weight (MW).

in U2OS cells (Figure 5F-5H). Upon ING4 depletion, such cells also manifested a shift in the ratio between lipidated and non-lipidated LC3 that is compatible with an induction of autophagy, in baseline condition (Figure 5I) or in presence of BAF1 for 3h (Figure 5J). Altogether, these data demonstrate that endogenous ING4 can act as repressor of autophagy.

Inhibition of the lipid kinase activity of PIK3C3 by ING4. Autophagy is tied to the BECN1-dependent activation of PIK3C3, resulting in the generation of PI3P that can be visualized by means of RFP-tagged short peptide (FYVE) that specifically binds to PI3P-containing subcellular vesicles [43]. Depletion of ING4 with three siRNAs induced the redistribution of RFP-FYVE from a diffuse to a punctiform pattern, indicating activation of PIK3C3 in baseline or nutrient free conditions (Figure 6A-

6B). Moreover, knockdown of BECN1 or PIK3C3 (Figure 6C), or its pharmacological inhibition by 3-methyladenine (3MA) or wortmannin (WM) abolished the induction of GFP-LC3 puncta in response to ING4 depletion (siING4A) (Figure 6D-6E). Altogether, these results indicate that ING4 inhibition causes autophagy through the activation of the lipid kinase activity of the BECN1/PIK3C3 complex.

Concluding remarks. The results reported in this paper support the contention that ING4 is indeed constitutively interacting with BECN1 in mammalian cells that are cultured in nutrient-rich conditions. However, upon nutrient depletion the BECN1 complex alters its composition, in line with the reported plasticity of the BECN1 interactome [8], and ING4 dissociates from BECN1. Similar dissociation processes have been reported

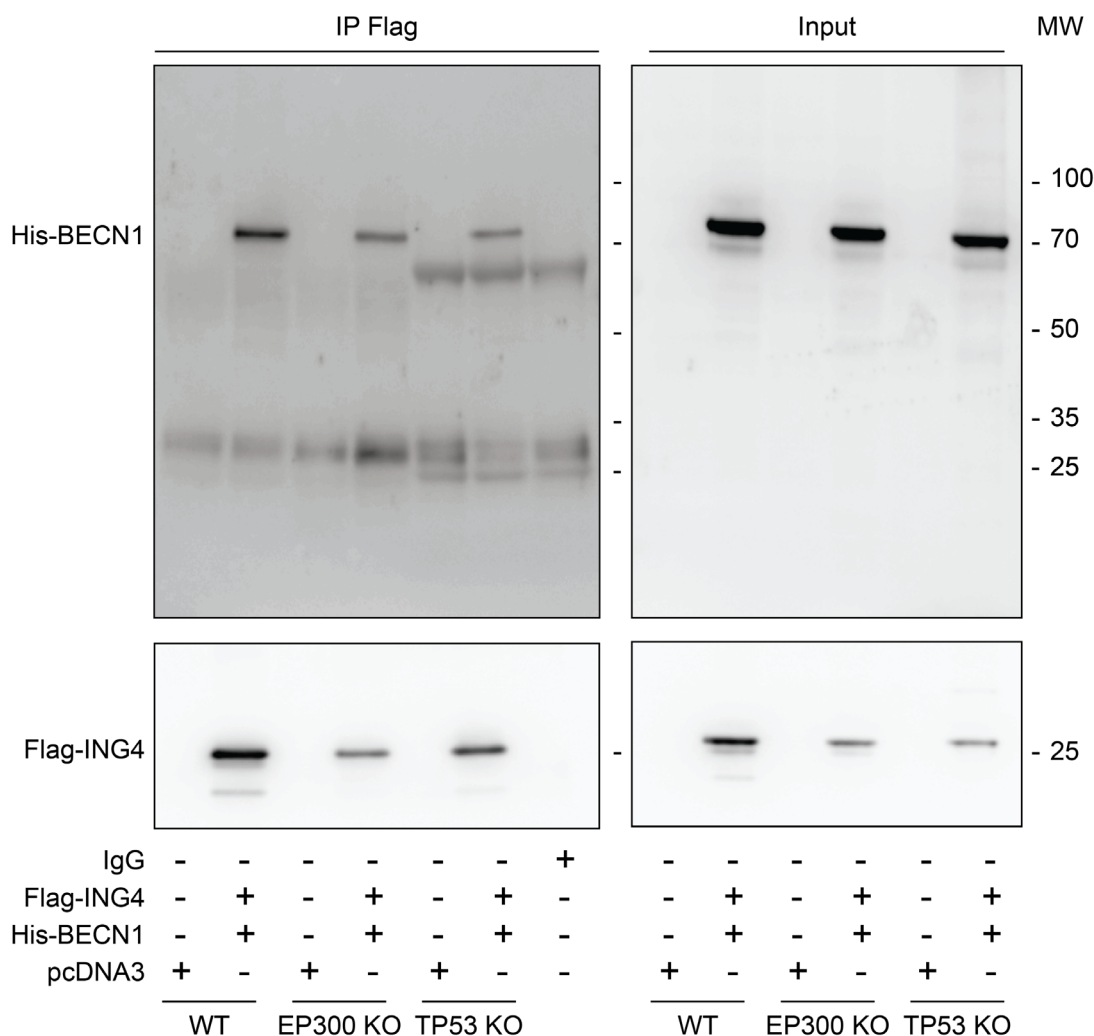

**Figure 2: EP300 or TP53 are dispensable for the interaction between ING4 and BECN1.** Co-immunoprecipitation of BECN1 with ING4. The indicated constructs, namely Flag-tagged ING4 (Flag-ING4) and His-tagged BECN1 (His-BECN1) were co-transfected into HCT116 wild-type (WT), EP300 or TP53 knock-out (KO) cells. The pcDNA3 construct was transfected as internal control of the experiment. Forty-eight hours later, ING4 was immunoprecipitated with a specific antibody for Flag and the precipitate was separated by SDS-PAGE and revealed with a specific antibody for His and also with a specific antibody for Flag as control. Results are representative of three independent experiments. Immunoprecipitation (IP), molecular weight (MW).



for B-cell lymphoma 2 (BCL-2) [9], B-cell lymphoma-extra large (Bcl-xL) [44], TGF $\beta$ -activated kinase 1 (TAK1)-binding proteins 2 and 3 (TAB2 and TAB3) [12], Golgi associated pathogenesis related-1 (GAPR1) [45] that all appear to be sufficient to cause BECN1/VPS34 inhibition because knockdown of BCL-2, Bcl-xL, TAB2, TAB3 and GAPR1 is sufficient to stimulate autophagy. Moreover, small molecules or peptides designed to competitively disrupt the interaction of BECN1 and BCL-2, Bcl-xL, TAB2, TAB3 and GAPR1 induce the formation of GFP-LC3B puncta, [9, 12, 44, 45] further supporting the pleiotropic nature of the suppressive interactions affecting the BECN1 complex. The mechanisms leading to ING4 dissociation from BECN1 in conditions of starvation are elusive. Previous work revealed that nutrient depletion causes the deacetylation of multiple autophagy-regulatory proteins [46] including that of BECN1, which is required

for autophagy induction [47]. At this stage, it remains to be determined whether ING4 can affect BECN1 acetylation or whether BECN1 acetylation influences the binding of ING4. Irrespective of these unknowns, it appears that the dissociation of the ING4-BECN1 interaction correlates with the induction of autophagy by other stimuli than starvation including addition of torin1, a specific inhibitor of mTOR (not shown).

It appears intriguing that ING4, which is generally viewed as a transcription-regulatory factor interacting with methylated histones (in particular H3K4me3) [48] and DNA [49] has major cytoplasmic functions as well. However, ING4 reportedly acts on NF- $\kappa$ B as an E3 ubiquitin ligase [36], and at least a fraction of ING4 is located in the cytoplasm [24], supporting the possibility that it exerts important extranuclear functions. Previous work has established that TP53 tonically inhibits

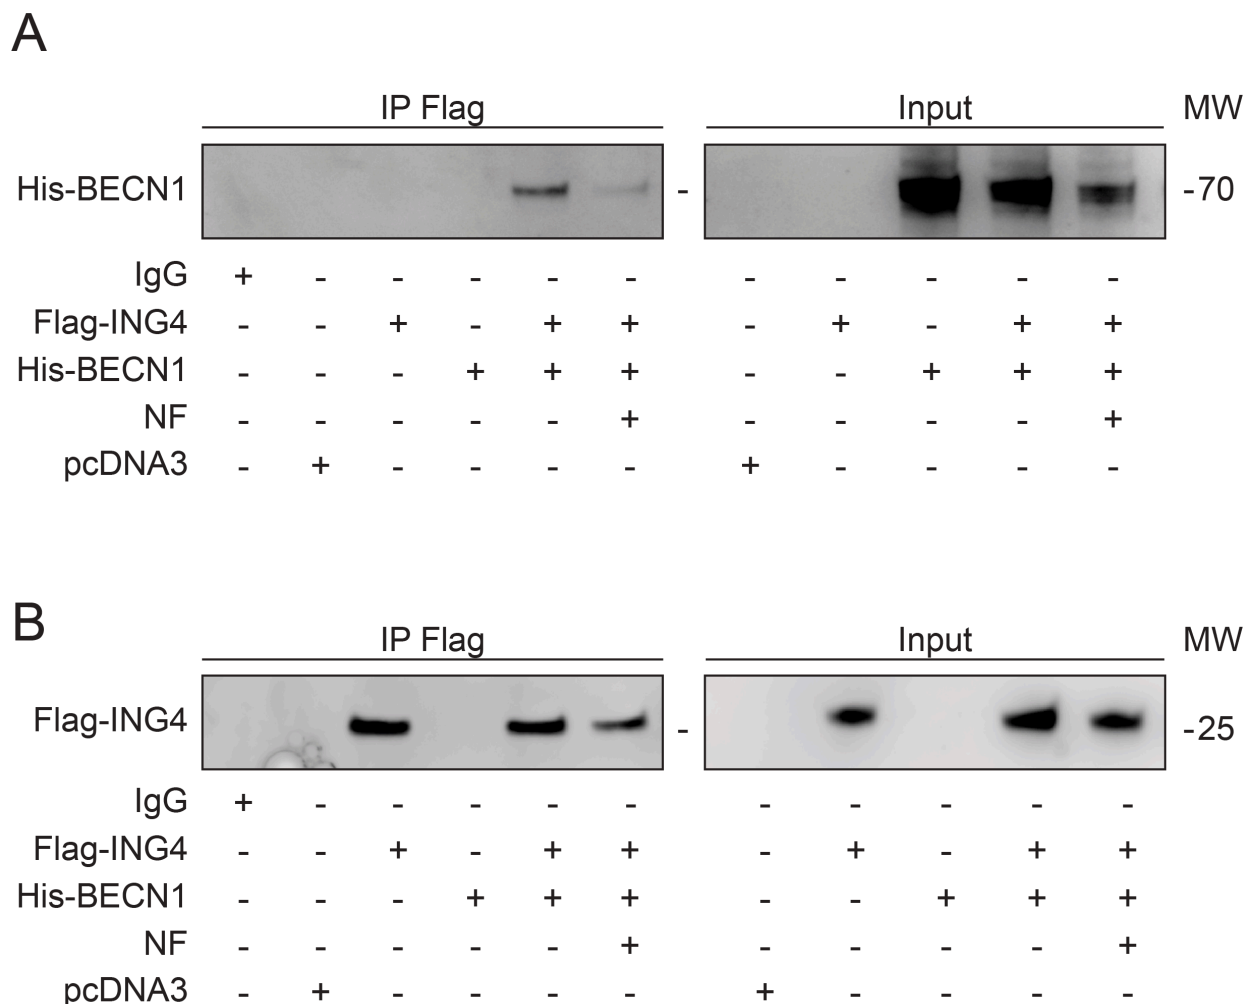

**Figure 3: Starvation induces autophagy and reduces the association of BECN1-ING4 in U2OS cells.** (A, B) The indicated constructs, namely Flag-tagged ING4 (Flag-ING4) and His-tagged BECN1 (His-BECN1) were transfected, alone or in combination, into U2OS cells. The pcDNA3 construct was transfected as internal control of the experiment. Forty-eight hours later, cells were treated with complete or nutrient free (NF) medium for 6h and consequently, ING4 was immunoprecipitated with a specific antibody for Flag. The precipitate was separated by SDS-PAGE and revealed with specific antibodies for His (A) and Flag (B). Immunoprecipitation (IP), molecular weight (MW).

autophagy by an interaction with RB1-inducible coiled-coil protein 1 (RB1CC1) [50-52] and other mechanisms [53]. Another case is provided by the transcription factor STAT3 that can inhibit autophagy in the cytoplasm by inhibiting eukaryotic translation initiation factor 2-alpha kinase 2 (EIF2AK2) [54]. Hence, ING4 apparently constitutes yet another example of multifunctional proteins that act at several subcellular localizations, namely, as nuclear (co)transcription factors and as direct inhibitors of the autophagic machinery.

Altogether, it appears that ING4 constitutes yet another regulator of autophagy that acts on the BECN1 complex, repressing its PIK3C3-mediated lipid kinase activity. Future work must determine whether and to which

extent this function contributes to the tumor suppressive action of ING4.

## MATERIALS AND METHODS

### Chemicals, cell lines and culture conditions

Unless otherwise indicated, chemicals were purchased by Sigma-Aldrich (St Louis, USA), and media and supplements for cell culture from Gibco-Invitrogen (Carlsbad, USA). Rapamycin was obtained by Tocris Bioscience (Ellisville, USA). All cells were maintained

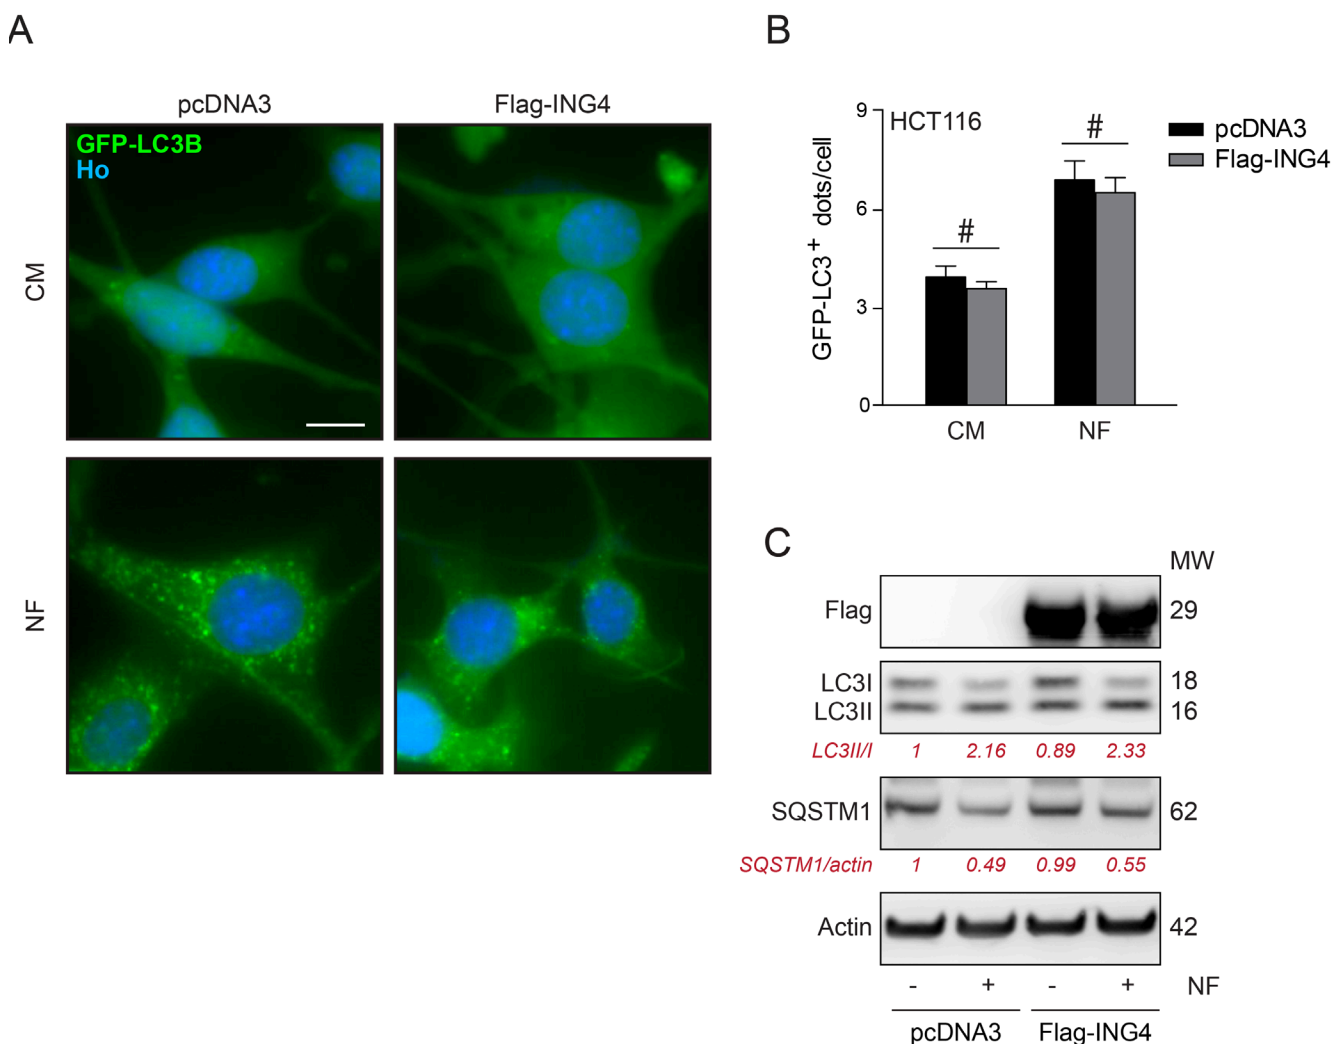

**Figure 4: Overexpression of ING4 has not inhibitory effect on starvation induced autophagy.** **A.** Representative photomicrographs of empty vector (pcDNA3) and ING4 (Flag-ING4) overexpressing HCT116 cells stably expressing GFP-LC3 treated in presence of complete (CM) or nutrient free (NF) medium for 6h. Hoechst 33342 (Ho, blue) represents nuclear staining. GFP-LC3B puncta (green) correspond to autophagosomes. Scale bars: 10  $\mu$ m. **B.** Quantification of GFP-LC3B puncta in cells treated in CM or NF medium. Data are means  $\pm$  SD ( $n = 5$ ). Statistical analysis was performed by Student's t test in comparison as indicated, #  $p > 0.05$ , not significant. **C.** Western blot detection and quantification of LC3 lipidation and SQSTM1 degradation in ING4 overexpressing HCT116 cells upon starvation (6h). Actin was used as a loading control. Densitometry was employed to quantify the abundance of lipidated LC3 (LC3-II/LC3I ratio) and SQSTM1 (normalized to actin levels). Results are representative of three independent experiments. Molecular weight (MW).

in standard culture conditions (37°C, 5% CO<sub>2</sub>). Human osteosarcoma U2OS cells (and their GFP-LC3 and FYVE-RFP-expressing derivatives) were cultured in Dulbecco's modified Eagle's medium (DMEM) supplemented with 10% Fetal bovine serum (FBS) and 10 mM HEPES. Human colon carcinoma HCT116 WT and GFP-LC3 stable expressing cells were maintained in McCoy's medium supplemented with 10% FCS, 100 mg/l sodium pyruvate and 10 mM HEPES. For serum and nutrient

starvation, cells were cultured in serum-free Earle's balanced salt solution (EBSS) for 6 h.

### siRNAs, plasmids and transfections

Cells at 50% confluence were transfected with a custom-made, non-targeting siRNA (siUNR, 5'-GCCGGUAUGCCGGUUAAGUdTdT-3')

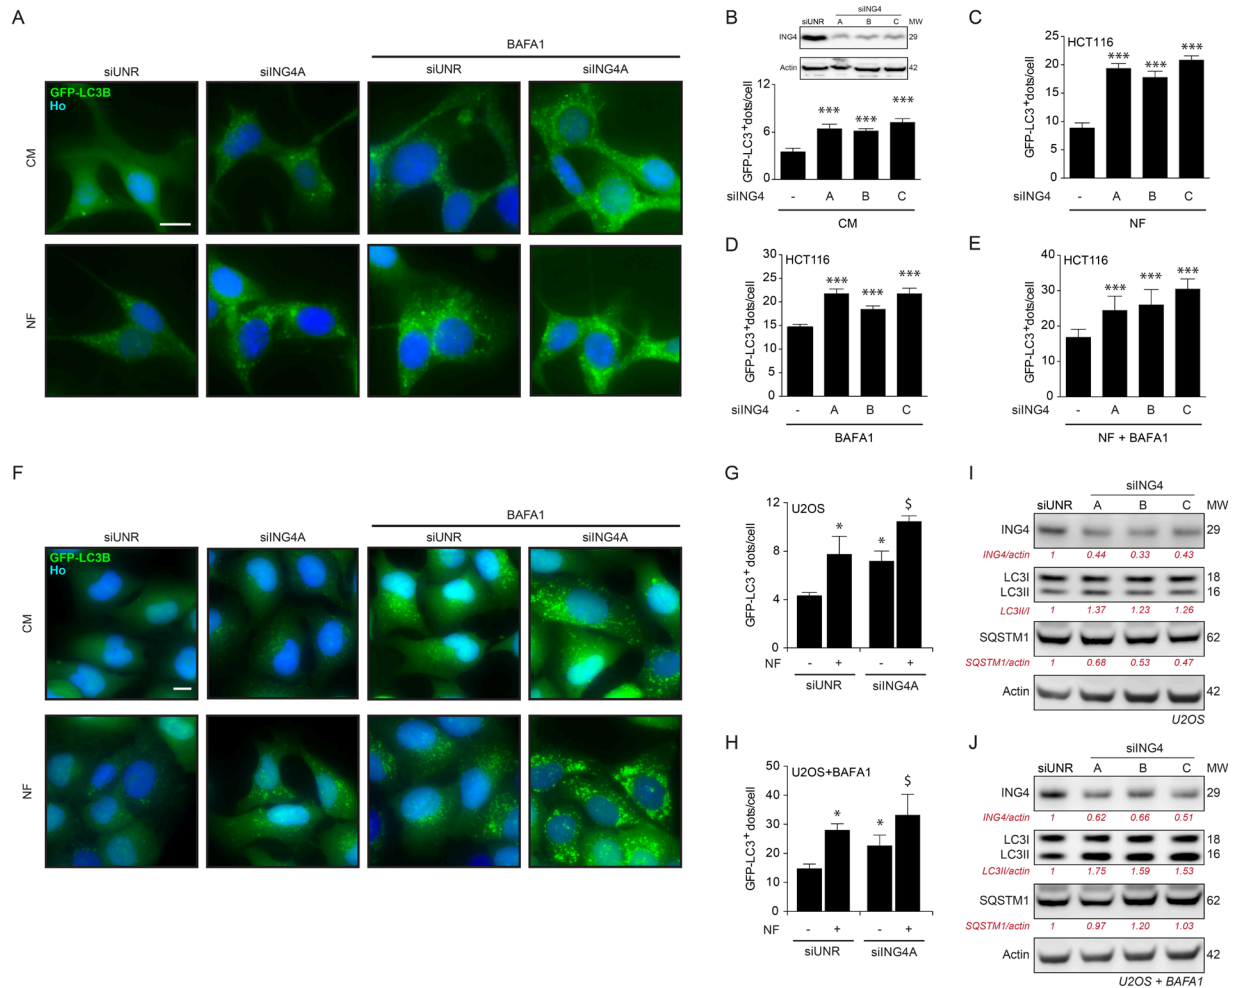

**Figure 5: ING4 silencing induces autophagy.** **A.** Representative photomicrographs of ING4 knockdown (siING4A) HCT116 cells stably expressing GFP-LC3 treated with complete (CM) or nutrient free (NF) medium for 6h, in presence or absence of 1 $\mu$ M bafilomycin A1 (BAFA1) for the last 3h. The non-targeting siRNA (siUNR) was used as internal control of the experiments. Hoechst 33342 (Ho, blue) represents nuclear staining. GFP-LC3B puncta (green) correspond to autophagosomes. Scale bars: 10  $\mu$ m. **B.-E.** Quantification of GFP-LC3B dots in ING4 knockdown HCT116 cells treated in CM or NF medium for 6h in presence or absence of BAFA1 for the last 3h. To knockdown ING4, 3 different siRNAs were used (siING4A, siING4B and siING4C). Western blot proves the efficiency of siING4s. Data are means  $\pm$  SD ( $n = 5$ ). Statistical analysis was performed by Student's t test in comparison with the control condition, \*\*\* $p < 0.001$ . **F.** Representative photomicrographs of siING4A knockdown U2OS cells stably expressing GFP-LC3, treated with NF medium for 6h or CM, in presence or absence of 1  $\mu$ M BAFA1 for the last 3h. Hoechst 33342 (Ho, blue) represents nuclear staining. GFP-LC3B puncta (green) correspond to autophagosomes. Scale bars: 10  $\mu$ m. **G., H.** Quantification of GFP-LC3B dots in siING4A U2OS cells treated in the same conditions described in (F). Data are means  $\pm$  SD ( $n = 5$ ). Statistical analysis was performed by Student's t test in comparison with the control condition (siUNR, \* $p < 0.05$ ; siING4A, \$ $p < 0.05$ ). **I., J.** Western blot detection of ING4 levels, LC3B conversion and SQSTM1 degradation in U2OS knockdown cells with 3 different ING4 siRNAs in absence (I) or presence (J) of 1  $\mu$ M BAFA1 for 3h. Actin was used as a loading control. Densitometry was employed to quantify the efficiency of the ING4 silencing and abundance of lipidated LC3 (LC3-II/LC3 I ratio or LC3II/actin ratio when BAFA1 is added) and SQSTM1 (normalized to actin levels). Results are representative of three independent experiments. Molecular weight (MW).

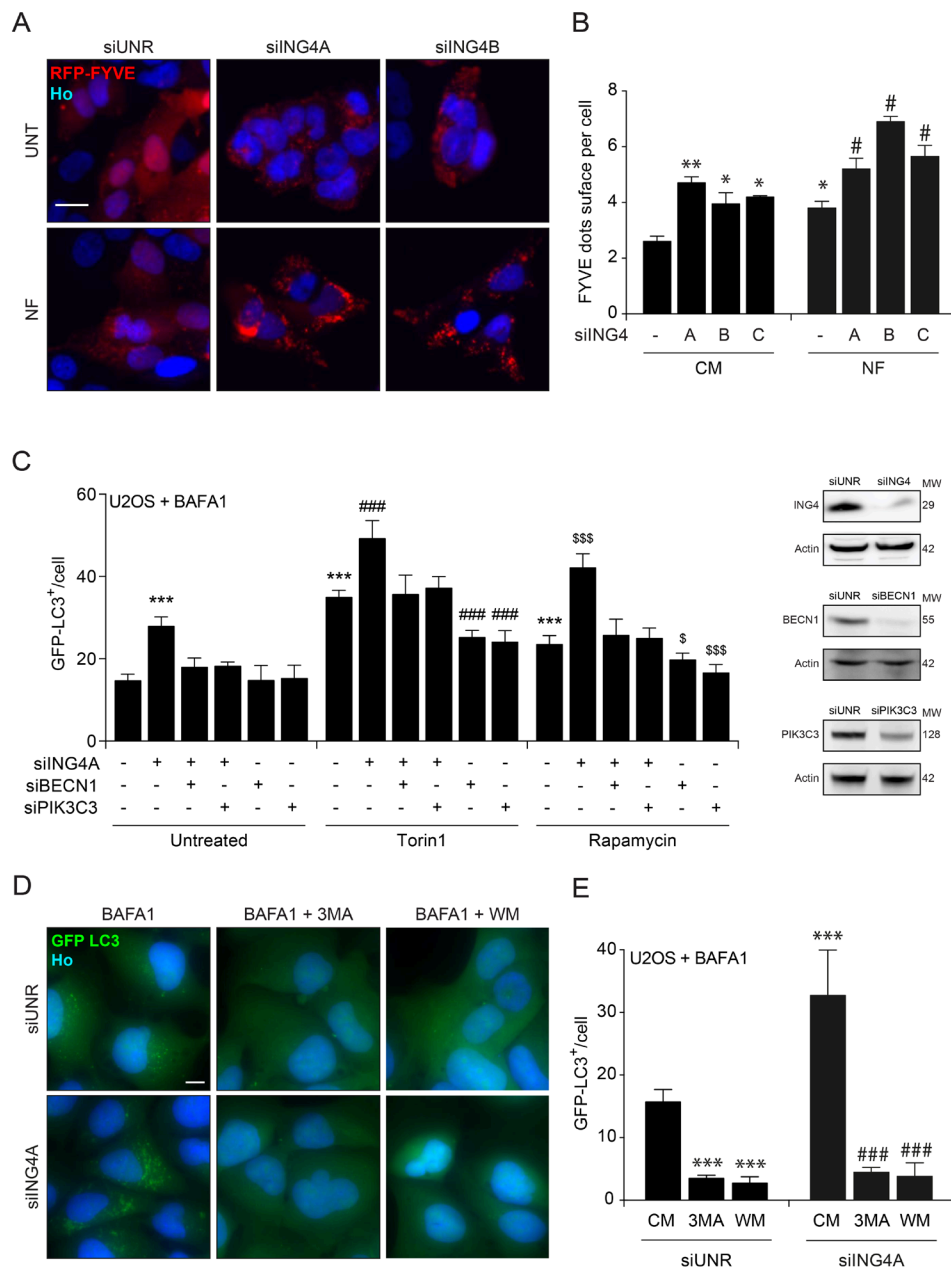

**Figure 6: ING4 silencing leads to autophagy due to an increase of the PIK3C3 activity.** **A.** Representative photomicrographs of ING4 knockdown (siING4A, siING4B) U2OS cells stably expressing RFP-tagged short peptide (FYVE) treated with complete (CM) or nutrient free (NF) medium for 6h. The non-targeting siRNA (siUNR) was used as internal control of the experiments. Hoechst 33342 (Ho, blue) represents nuclear staining. RFP-tagged short peptide (red) corresponds to activation of PIK3C3. Scale bars: 10  $\mu$ m. **B.** Quantification of FYVE puncta upon ING4 silencing (siING4A, siING4B, siING4C), in cells treated with CM or NF for 6h. Data are means  $\pm$  SD ( $n = 5$ ). Statistical analysis was performed by Student's t test in comparison with the control condition (\*\* $p < 0.01$ , \* $p < 0.05$ ) or in comparison with the NF condition (#  $p < 0.05$ ). **C.** Quantification of the number of GFP-LC3B dots in U2OS cells knockdown for ING4 (siING4A), Beclin 1 (siBECN1) or PIK3C3 (siPIK3C3) alone or in combination as indicated. Western blot proves the efficiency of ING4, BECN1 and PIK3C3 siRNAs. After the silencing cells were treated with complete medium (Untreated), Torin1 (300nM) or Rapamycin (1  $\mu$ M) for 6h in presence of BAFA1 (1  $\mu$ M) for the last 3h. Data are means  $\pm$  SD ( $n = 5$ ). Statistical analysis was performed by Student's t test in comparison with the control condition (\*\* $p < 0.001$ ) or in comparison with the Torin1 (###  $p < 0.001$ ) or Rapamycin (\$  $p < 0.05$ , \$\$\$  $p < 0.001$ ) conditions. **D.** Representative photomicrographs of ING4 knockdown (siING4A) U2OS cells stably expressing GFP-LC3B treated with complete medium (CM) or 3 methyladenine (3MA; 10mM) or wortmannin (WM; 10  $\mu$ M) for 6h in presence of BAFA1 (1  $\mu$ M) for the last 3h. **(E)** Quantification of the number of GFP-LC3B dots in ING4 knockdown (siING4A) U2OS cells, treated with chemical inhibitors of PIK3C3: 3MA or WM for 6h in presence of BAFA1 (1  $\mu$ M) for the last 3h. Data are means  $\pm$  SD ( $n = 5$ ). Statistical analysis was performed by Student's t test in comparison with the CM of siUNR condition (\*\* $p < 0.001$ ) or in comparison with the CM of siING4A condition (###  $p < 0.001$ ).



or with siRNAs specific to PIK3C3 (5'-ACG-GTGATGAATCATCTCCdTdT-3'), BECN1 (5'-UUCCGUAAGGAACAAGUCGG-d TdT-3'), ING4A (5'-rgrgrCrCrArCUrgrArgUrAUrAUrgrArgU TT-3'), ING4B (5'-rgrCrgrCrArCrArArgUrCrCUrgrArgUrAU TT-3') or ING4C (Scbt, Sc-60850). siRNA transfections were performed by means of the Lipofectamine® RNAiMAX reagent (Invitrogen), according to the manufacturer's instructions.

Plasmid transfection was carried out by means of the FuGENE® HD Transfection Reagent (Promega), as recommended by the manufacturer. A plasmid encoding a His-BECN1 was co-transfected with the empty vector pcDNA3.1 (Invitrogen) or with mammalian expression vectors encoding Flag-ING4.

### Immunoblotting and immunoprecipitation

Immunoblotting was performed following standard procedures. In short, 20 µg of protein were separated on NuPAGE Novex Bis-Tris 4-12% pre-cast gels (Invitrogen-Life Technologies, Carlsbad, CA, USA) and transferred to Immobilon polyvinylidene difluoride membranes (Merck-Millipore, Darmstadt, Germany). Unspecific binding was reduced by incubating the membranes for 1h in 0.05% Tween 20 (v/v in Tris-buffered saline, TBS) supplemented with 5% w/v bovine serum albumin (Euromedex, Souffelweyersheim, France). Following, membranes were probed with antibodies specific for LC3B (CST, #2275), SQSTM1 (Abnova, #H00008878-M01), ING4 (Invitrogen, #40-7700) beta Actin (ab20272), Flag (Sigma, #F3040), His (CST, #2365) and Acetylated lysine (CST, #9441), BECN1 (Scbt, sc-11427), PIK3C3 (CST, #4263). Primary antibodies were revealed with species-specific immunoglobulin G conjugated to horseradish peroxidase (Southern Biotech, Birmingham, AL, USA), followed by chemiluminescence analysis with the SuperSignal West Pico reagent by means of an ImageQuant 4000 (GE Healthcare, Little Chalfont, UK). A primary antibody that specifically recognizes actin was used to ensure equal lane loading. Western blot images were quantified by using ImageJ software.

For immunoprecipitation,  $7 \times 10^6$  cells were lysed as previously described [55], and 400 µg of proteins was pre-cleared for 1 h with 30 µl of Pure Proteome™ Protein G Magnetic Beads (Millipore), followed by incubation for 4 h in the presence of 2 µg of specific antibodies or IgG controls. Subsequent immunoblotting was carried out using TrueBlot™-HRP (eBioscience, San Diego, USA) secondary antibodies.

### High-throughput assessment of LC3 lipidation and FYVE dots

Five  $\times 10^3$  U2OS FYVE-RFP, U2OS or HCT116 cells stably expressing LC3-GFP were seeded into black 96-well µclear imaging plates (Greiner Bio-One) and allowed to adapt for 24 h. Thereafter the cells were treated with nutrient-free medium, 3-methyladenine, wortmannin (with or without bafilomycin A1) and respective controls and incubated for additional 6h before fixation in 3.7 % (w/v) paraformaldehyde (PFA) in phosphate-buffered saline (PBS) supplemented with 1 µM Hoechst 33342 at 4°C over night. Upon fixation, PFA was substituted with PBS and a minimum of four view fields per well were acquired by means of an ImageXpress micro XL automated bioimager (Molecular Devices) equipped with a PlanApo 20X/0.75 NA objective (Nikon).

### Data processing and statistical analyses

Unless otherwise specified, independent experiments were performed in triplicate parallel instances and repeated three times. Microscopy images were segmented and analyzed by means of the MetaXpress (Molecular Devices) software. Unless otherwise specified, data are presented as means  $\pm$  S.D. Significance was assessed by means of two-tailed Student's t-test.

### ACKNOWLEDGMENTS AND FUNDING

We are grateful to Jean-Christophe Rain, Drs O Geneste and JA Hickman (Institut de Recherche Servier, Croissy sur Seine, France) for sharing data on the Beclin 1 interactome and the Hybrigenics team for excellent technical assistance. We are indebted to Prof. Berth Vogelstein for *TP53* and *EP300* knockout cells. G.M. is funded by the Ramon y Cajal Program (RYC-2013-12751) and supported by Spain's Ministerio de Economía y Competitividad, BFU2015-68539 and the BBVA foundation, SV-15-FBBVA-2. M. N-S was supported by "Contrato Juan de la Cierva" (JCI-2012-14383) from Ministerio de Economía y Competitividad, Spain.

GK is supported by the Ligue contre le Cancer (équipe labélisée); Agence National de la Recherche (ANR) - Projets blancs; ANR under the frame of E-Rare-2, the ERA-Net for Research on Rare Diseases; Association pour la recherche sur le cancer (ARC); Cancéropôle Ile-de-France; Institut National du Cancer (INCa); Institut Universitaire de France; Fondation pour la Recherche Médicale (FRM); the European Commission (ArtForce); the European Research Council (ERC); the LeDucq Foundation; the LabEx Immuno-Oncology; the RHU Torino Lumière, the SIRIC Stratified Oncology Cell DNA Repair and Tumor Immune Elimination (SOCRATE); the SIRIC Cancer Research and Personalized Medicine

(CARPEM); and the Paris Alliance of Cancer Research Institutes (PACRI).

## CONFLICTS OF INTEREST

There is no conflict of interest.

## REFERENCES

1. Sica V, Galluzzi L, Bravo-San Pedro JM, Izzo V, Maiuri MC, Kroemer G. Organelle-Specific Initiation of Autophagy. *Mol Cell*. 2015; 59: 522-39.
2. Pietrocola F, Demont Y, Castoldi F, Enot D, Durand S, Semeraro M, Baracco EE, Pol J, Bravo-San Pedro JM, Bordenave C, Levesque S, Humeau J, Chery A, et al. Metabolic effects of fasting on human and mouse blood in vivo. *Autophagy*. 2017; 13:567-578. doi: 10.1080/15548627.2016.1271513.
3. Madeo F, Zimmermann A, Maiuri MC, Kroemer G. Essential role for autophagy in life span extension. *J Clin Invest*. 2015; 125: 85-93.
4. Galluzzi L, Bravo-San Pedro JM, Kroemer G. Defective Autophagy Initiates Malignant Transformation. *Mol Cell*. 2016; 62: 473-4.
5. Galluzzi L, Bravo-San Pedro JM, Blomgren K, Kroemer G. Autophagy in acute brain injury. *Nat Rev Neurosci*. 2016; 17: 467-84.
6. Klionsky DJ, Abdelmohsen K, Abe A, Abedin MJ, Abeliovich H, Acevedo Arozena A, Adachi H, Adams CM, Adams PD, Adeli K, Adhietty PJ, Adler SG, Agam G, et al. Guidelines for the use and interpretation of assays for monitoring autophagy (3rd edition). *Autophagy*. 2016; 12: 1-222.
7. Antonioli M, Di Rienzo M, Piacentini M, Fimia GM. Emerging Mechanisms in Initiating and Terminating Autophagy. *Trends Biochem Sci*. 2017; 42: 28-41.
8. He C, Levine B. The Beclin 1 interactome. *Curr Opin Cell Biol*. 2010; 22: 140-9.
9. Pattingre S, Tassa A, Qu X, Garuti R, Liang XH, Mizushima N, Packer M, Schneider MD, Levine B. Bcl-2 antiapoptotic proteins inhibit Beclin 1-dependent autophagy. *Cell*. 2005; 122: 927-39.
10. Maiuri MC, Le Toumelin G, Criollo A, Rain JC, Gautier F, Juin P, Tasdemir E, Pierron G, Troulinaki K, Tavernarakis N, Hickman JA, Geneste O, Kroemer G. Functional and physical interaction between Bcl-X(L) and a BH3-like domain in Beclin-1. *EMBO J*. 2007; 26: 2527-39.
11. Maiuri MC, Criollo A, Kroemer G. Crosstalk between apoptosis and autophagy within the Beclin 1 interactome. *EMBO J*. 2010; 29: 515-6.
12. Criollo A, Niso-Santano M, Malik SA, Michaud M, Morselli E, Marino G, Lachkar S, Arkhipenko AV, Harper F, Pierron G, Rain JC, Ninomiya-Tsuji J, Fuentes JM, et al. Inhibition of autophagy by TAB2 and TAB3. *EMBO J*. 2011; 30: 4908-20.
13. He GH, Helbing CC, Wagner MJ, Sensen CW, Riabowol K. Phylogenetic analysis of the ING family of PHD finger proteins. *Mol Biol Evol*. 2005; 22: 104-16.
14. Campos EI, Chin MY, Kuo WH, Li G. Biological functions of the ING family tumor suppressors. *Cell Mol Life Sci*. 2004; 61: 2597-613.
15. Soliman MA, Berardi P, Pastyryeva S, Bonnefin P, Feng X, Colina A, Young D, Riabowol K. ING1a expression increases during replicative senescence and induces a senescent phenotype. *Aging Cell*. 2008; 7: 783-94.
16. Shah S, Smith H, Feng X, Rancourt DE, Riabowol K. ING function in apoptosis in diverse model systems. *Biochem Cell Biol*. 2009; 87: 117-25.
17. Doyon Y, Cayrou C, Ullah M, Landry AJ, Cote V, Selleck W, Lane WS, Tan S, Yang XJ, Cote J. ING tumor suppressor proteins are critical regulators of chromatin acetylation required for genome expression and perpetuation. *Mol Cell*. 2006; 21: 51-64.
18. Skowrya D, Zeremski M, Neznanov N, Li M, Choi Y, Uesugi M, Hauser CA, Gu W, Gudkov AV, Qin J. Differential association of products of alternative transcripts of the candidate tumor suppressor ING1 with the mSin3/HDAC1 transcriptional corepressor complex. *J Biol Chem*. 2001; 276: 8734-9.
19. Jafarnejad SM, Li G. Regulation of p53 by ING family members in suppression of tumor initiation and progression. *Cancer Metastasis Rev*. 2012; 31: 55-73.
20. Nouman GS, Angus B, Lunec J, Crosier S, Lodge A, Anderson JJ. Comparative assessment expression of the inhibitor of growth 1 gene (ING1) in normal and neoplastic tissues. *Hybrid Hybridomics*. 2002; 21: 1-10.
21. Nouman GS, Anderson JJ, Lunec J, Angus B. The role of the tumour suppressor p33 ING1b in human neoplasia. *J Clin Pathol*. 2003; 56: 491-6.
22. Ythier D, Larrieu D, Brambilla C, Brambilla E, Pedeux R. The new tumor suppressor genes ING: genomic structure and status in cancer. *Int J Cancer*. 2008; 123: 1483-90.
23. Garkavtsev I, Kozin SV, Chernova O, Xu L, Winkler F, Brown E, Barnett GH, Jain RK. The candidate tumour suppressor protein ING4 regulates brain tumour growth and angiogenesis. *Nature*. 2004; 428: 328-32.
24. Byron SA, Min E, Thal TS, Hostetter G, Watanabe AT, Azorsa DO, Little TH, Tapia C, Kim S. Negative regulation of NF-kappaB by the ING4 tumor suppressor in breast cancer. *PLoS One*. 2012; 7: e46823.
25. Yuan J, Han YL, Wang TY, Wu S, Tong L, Lin LX, Li M, Wei LL, Zhong ZH, Zhang GM, Wang Y. The expression of inhibitor of growth 4 is reduced in cervical cancer tissues. *Eur Rev Med Pharmacol Sci*. 2016; 20: 3178-85.
26. Wang Y, Wang T, Han Y, Wu H, Zhao W, Tong D, Wei L, Zhong Z, An R, Wang Y. Reduced ING4 Expression Is Associated with the Malignancy of Human Bladder. *Urol Int*. 2015; 94: 464-71.

27. Chen Y, Huang Y, Hou P, Zhang Z, Zhang Y, Wang W, Sun G, Xu L, Zhou J, Bai J, Zheng J. ING4 suppresses tumor angiogenesis and functions as a prognostic marker in human colorectal cancer. *Oncotarget*. 2016; 7:79017-79031. <https://doi.org/10.18632/oncotarget.12984>.
28. Nanding A, Tang L, Cai L, Chen H, Geng J, Liu X, Ning X, Li X, Zhang Q. Low ING4 protein expression detected by paraffin-section immunohistochemistry is associated with poor prognosis in untreated patients with gastrointestinal stromal tumors. *Gastric Cancer*. 2014; 17: 87-96.
29. Zhu Y, Lv H, Xie Y, Sheng W, Xiang J, Yang J. Enhanced tumor suppression by an ING4/IL-24 bicistronic adenovirus-mediated gene cotransfer in human non-small cell lung cancer cells. *Cancer Gene Ther*. 2011; 18: 627-36.
30. Ling C, Xie Y, Zhao D, Zhu Y, Xiang J, Yang J. Enhanced radiosensitivity of non-small-cell lung cancer (NSCLC) by adenovirus-mediated ING4 gene therapy. *Cancer Gene Ther*. 2012; 19: 697-706.
31. Han Z, Zhou C, Sun B, Yan Q, Zhang J. Experimental studies on the inhibition of adenovirus-ING4-OSM therapy on nasopharyngeal carcinoma proliferation in vitro and in vivo. *Cell Biochem Biophys*. 2014; 70: 1573-8.
32. Xu M, Xie Y, Sheng W, Miao J, Yang J. Adenovirus-mediated ING4 Gene Transfer in Osteosarcoma Suppresses Tumor Growth via Induction of Apoptosis and Inhibition of Tumor Angiogenesis. *Technol Cancer Res Treat*. 2015; 14: 617-26.
33. Ashshi AM, El-Shemi AG, Dmitriev IP, Kashentseva EA, Curiel DT. Combinatorial strategies based on CRAAd-IL24 and CRAAd-ING4 virotherapy with anti-angiogenesis treatment for ovarian cancer. *J Ovarian Res*. 2016; 9: 38.
34. Zhang X, Xu LS, Wang ZQ, Wang KS, Li N, Cheng ZH, Huang SZ, Wei DZ, Han ZG. ING4 induces G2/M cell cycle arrest and enhances the chemosensitivity to DNA-damage agents in HepG2 cells. *FEBS Lett*. 2004; 570: 7-12.
35. Shiseki M, Nagashima M, Pedeux RM, Kitahama-Shiseki M, Miura K, Okamura S, Onogi H, Higashimoto Y, Appella E, Yokota J, Harris CC. p29ING4 and p28ING5 bind to p53 and p300, and enhance p53 activity. *Cancer Res*. 2003; 63: 2373-8.
36. Hou Y, Zhang Z, Xu Q, Wang H, Xu Y, Chen K. Inhibitor of growth 4 induces NFkappaB/p65 ubiquitin-dependent degradation. *Oncogene*. 2014; 33: 1997-2003.
37. Hung T, Binda O, Champagne KS, Kuo AJ, Johnson K, Chang HY, Simon MD, Kutateladze TG, Gozani O. ING4 mediates crosstalk between histone H3 K4 trimethylation and H3 acetylation to attenuate cellular transformation. *Mol Cell*. 2009; 33: 248-56.
38. Culurgioni S, Munoz IG, Moreno A, Palacios A, Villate M, Palmero I, Montoya G, Blanco FJ. Crystal structure of inhibitor of growth 4 (ING4) dimerization domain reveals functional organization of ING family of chromatin-binding proteins. *J Biol Chem*. 2012; 287: 10876-84.
39. Galluzzi L, Pietrocola F, Levine B, Kroemer G. Metabolic control of autophagy. *Cell*. 2014; 159: 1263-76.
40. Bunz F, Dutriaux A, Lengauer C, Waldman T, Zhou S, Brown JP, Sedivy JM, Kinzler KW, Vogelstein B. Requirement for p53 and p21 to sustain G2 arrest after DNA damage. *Science*. 1998; 282: 1497-501.
41. Levine B, Kroemer G. Autophagy in the pathogenesis of disease. *Cell*. 2008; 132: 27-42.
42. Mizushima N, Levine B, Cuervo AM, Klionsky DJ. Autophagy fights disease through cellular self-digestion. *Nature*. 2008; 451: 1069-75.
43. Zhang L, Yu J, Pan H, Hu P, Hao Y, Cai W, Zhu H, Yu AD, Xie X, Ma D, Yuan J. Small molecule regulators of autophagy identified by an image-based high-throughput screen. *Proc Natl Acad Sci U S A*. 2007; 104: 19023-8.
44. Maiuri MC, Tasdemir E, Criollo A, Morselli E, Vicencio JM, Carnuccio R, Kroemer G. Control of autophagy by oncogenes and tumor suppressor genes. *Cell Death Differ*. 2009; 16: 87-93.
45. Shoji-Kawata S, Sumpter R, Leveno M, Campbell GR, Zou Z, Kinch L, Wilkins AD, Sun Q, Pallauf K, MacDuff D, Huerta C, Virgin HW, Helms JB, et al. Identification of a candidate therapeutic autophagy-inducing peptide. *Nature*. 2013; 494: 201-6.
46. Marino G, Pietrocola F, Eisenberg T, Kong Y, Malik SA, Andryushkova A, Schroeder S, Pendl T, Harger A, Niso-Santano M, Zamzami N, Scoazec M, Durand S, et al. Regulation of autophagy by cytosolic acetyl-coenzyme A. *Mol Cell*. 2014; 53: 710-25.
47. Sun T, Li X, Zhang P, Chen WD, Zhang HL, Li DD, Deng R, Qian XJ, Jiao L, Ji J, Li YT, Wu RY, Yu Y, et al. Acetylation of Beclin 1 inhibits autophagosome maturation and promotes tumour growth. *Nat Commun*. 2015; 6: 7215.
48. Palacios A, Munoz IG, Pantoja-Uceda D, Marcaida MJ, Torres D, Martin-Garcia JM, Luque I, Montoya G, Blanco FJ. Molecular basis of histone H3K4me3 recognition by ING4. *J Biol Chem*. 2008; 283: 15956-64.
49. Ormazza G, Medagli B, Ibanez de Opakua A, Rodriguez JA, Merino N, Villate M, Onesti S, Blanco FJ. The tumor suppressor inhibitor of growth 4 binds double-stranded DNA through its disordered central region. *FEBS Lett*. 2017; 591: 425-32.
50. Morselli E, Tasdemir E, Maiuri MC, Galluzzi L, Kepp O, Criollo A, Vicencio JM, Soussi T, Kroemer G. Mutant p53 protein localized in the cytoplasm inhibits autophagy. *Cell Cycle*. 2008; 7: 3056-61.
51. Morselli E, Shen S, Ruckenstein C, Bauer MA, Marino G, Galluzzi L, Criollo A, Michaud M, Maiuri MC, Chano T, Madeo F, Kroemer G. p53 inhibits autophagy by interacting with the human ortholog of yeast Atg17, RB1CC1/FIP200. *Cell Cycle*. 2011; 10: 2763-9.
52. Yu X, Munoz-Alarcon A, Ajayi A, Webling KE, Steinhof A, Langel U, Strom AL. Inhibition of autophagy via p53-mediated disruption of ULK1 in a SCA7 polyglutamine disease model. *J Mol Neurosci*. 2013; 50: 586-99.

53. Cordani M, Butera G, Pacchiana R, Donadelli M. Molecular interplay between mutant p53 proteins and autophagy in cancer cells. *Biochim Biophys Acta*. 2017; 1867: 19-28.
54. Shen S, Niso-Santano M, Adjemian S, Takehara T, Malik SA, Minoux H, Souquere S, Marino G, Lachkar S, Senovilla L, Galluzzi L, Kepp O, Pierron G, et al. Cytoplasmic STAT3 represses autophagy by inhibiting PKR activity. *Mol Cell*. 2012; 48: 667-80.
55. Criollo A, Maiuri MC, Tasmir E, Vitale I, Fiebig AA, Andrews D, Molgo J, Diaz J, Lavandro S, Harper F, Pierron G, di Stefano D, Rizzuto R, et al. Regulation of autophagy by the inositol trisphosphate receptor. *Cell Death Differ*. 2007; 14: 1029-39.
